# Supplementary material for: Three Dimensional Printing of Multiscale Carbon Fiber-Reinforced Polymer Composites Containing Graphene or Carbon Nanotubes
Source: MDPI journal article supplement (doi:10.3390/nano12122064), 2022-06-15
Supplement: s1 [file s1]

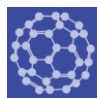

Supplementary

# Three Dimensional Printing of Multiscale Carbon Fiber-Reinforced Polymer Composites Containing Graphene or Carbon Nanotubes

Sara Residori <sup>1</sup>, Sithiprumnea Dul <sup>2</sup>, Alessandro Pegoretti <sup>2</sup>, Luca Fambri <sup>2,\*</sup> and Nicola M. Pugno <sup>1,3,\*</sup>

<sup>1</sup> Laboratory for Bioinspired, Bionic, Nano, Meta Materials & Mechanics, Department of Civil, Environmental and Mechanical Engineering, University of Trento, Via Mesiano, 77, 38123 Trento, Italy; sara.residori@unitn.it

<sup>2</sup> Department of Industrial Engineering and INSTM Research Unit, University of Trento, Via Sommarive, 9, 38123 Trento, Italy; sithiprumnea\_dul@yahoo.com (S.D.); alessandro.pegoretti@unitn.it (A.P.)

<sup>3</sup> School of Engineering and Material Science, Queen Mary University of London, Mile End Road, London E1 4NS, UK

\* Correspondence: luca.fambri@unitn.it (L.F.); nicola.pugno@unitn.it (N.M.P.)

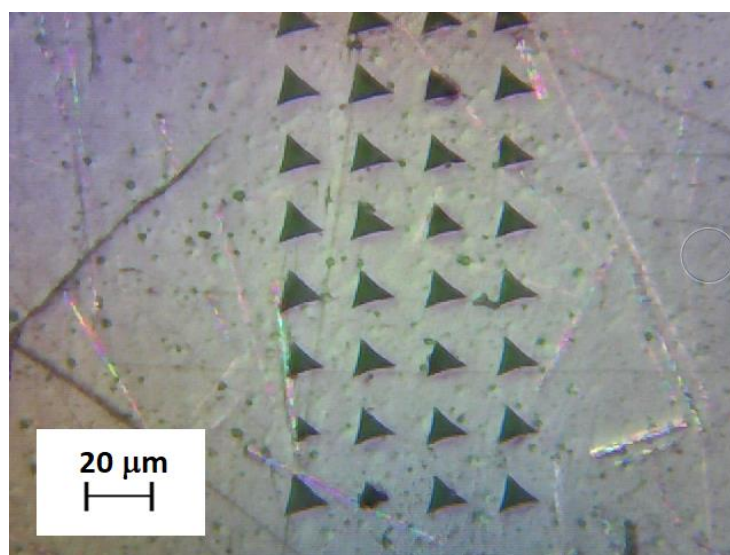

**Figure S1.** Example of an optical microscopy of CM nanocomposites tested surface after nanoindentation ( $8 \times 4$  indents). The chosen set-up of  $10 \times 10$  imprints in the  $200 \mu\text{m} \times 200 \mu\text{m}$  area is the minimum one that ensures adequate mapping of the properties. The chosen set-up of  $10 \times 10$  imprints in the  $200 \times 200 \mu\text{m}$  area is the minimum one that ensures adequate mapping of the properties.

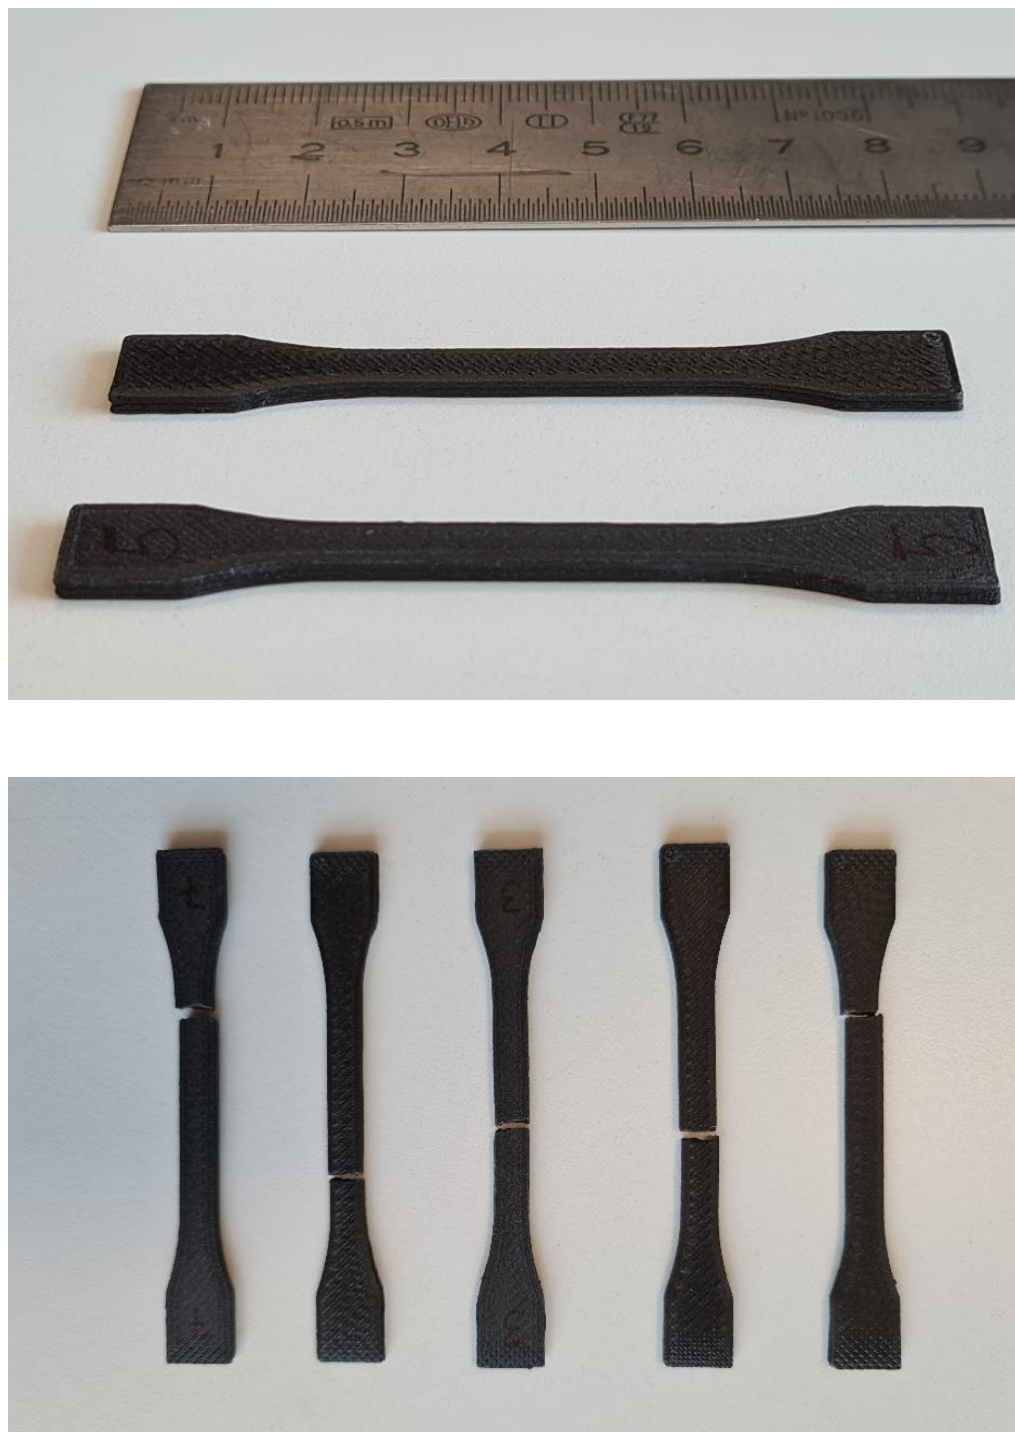

**Figure S2.** Representative 3D dumbbell specimens of ABS-MCF20 composites before (top)) and after (bottom) mechanical test.

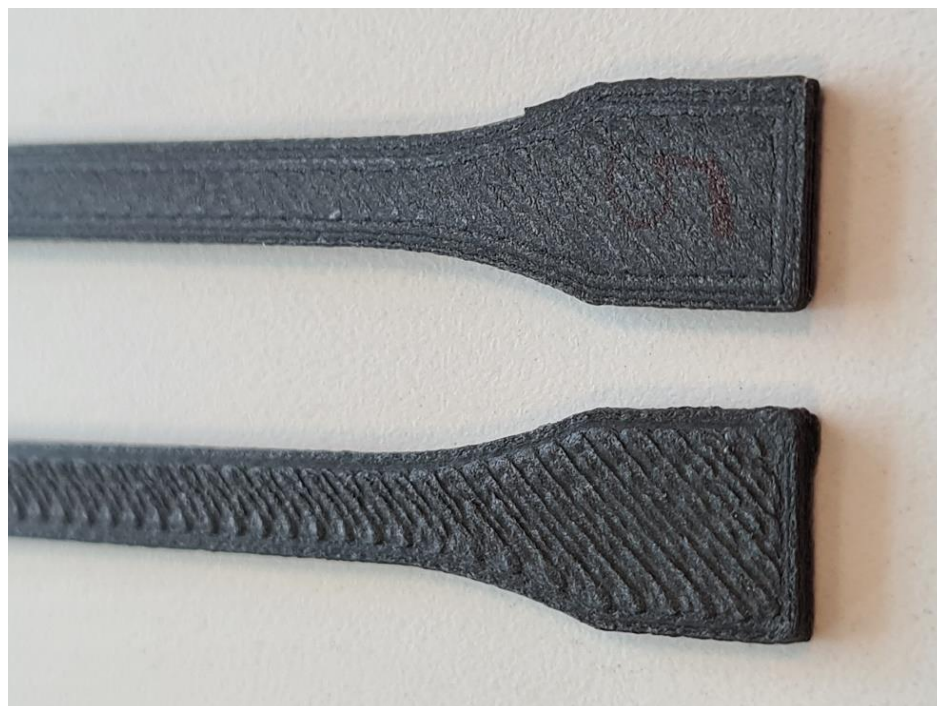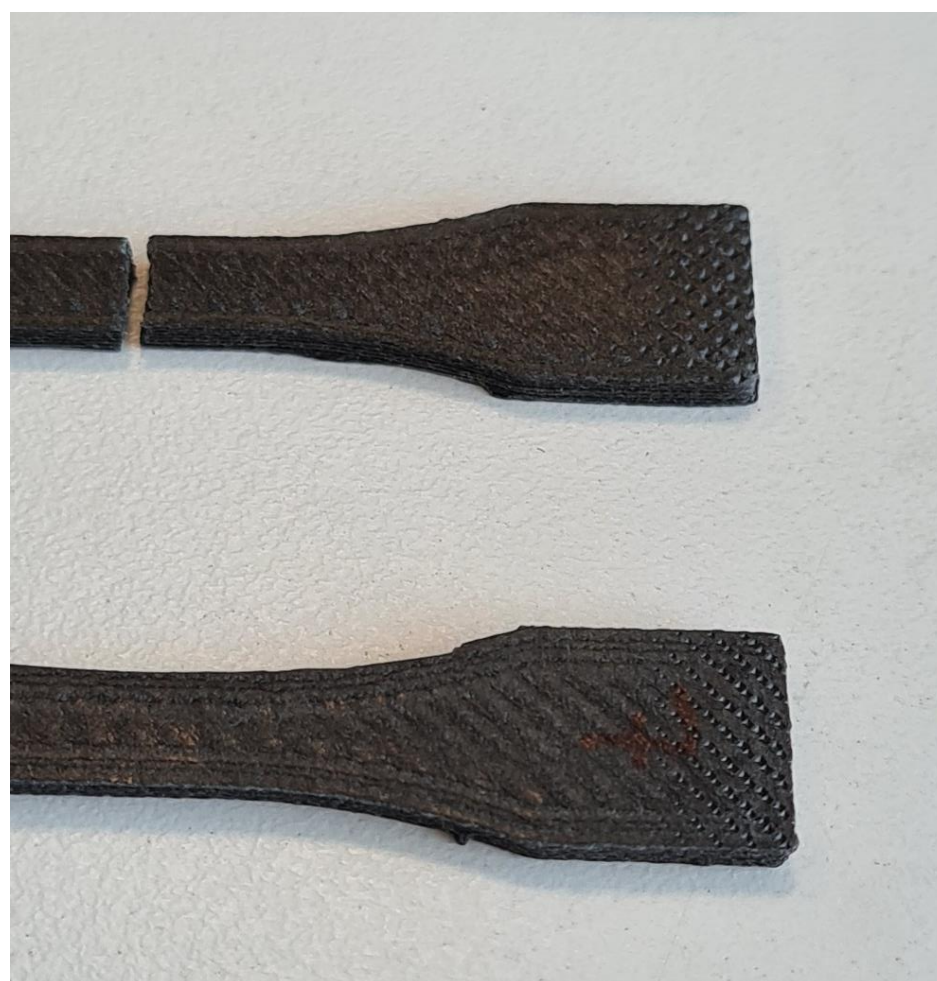

**Figure S3.** Magnified view of the clamping side of 3D dumbbell specimens before (top) and after (bottom) mechanical test.

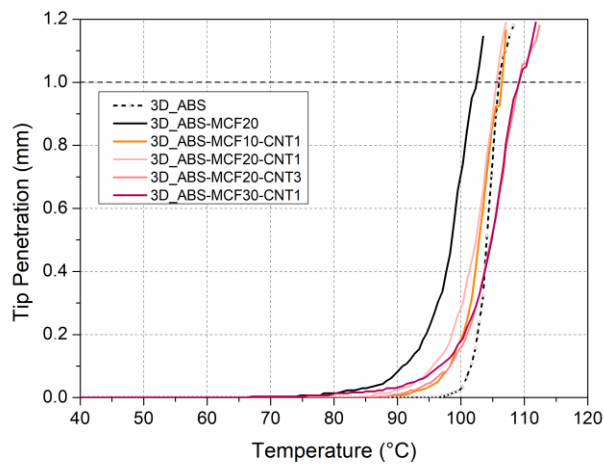

(a)

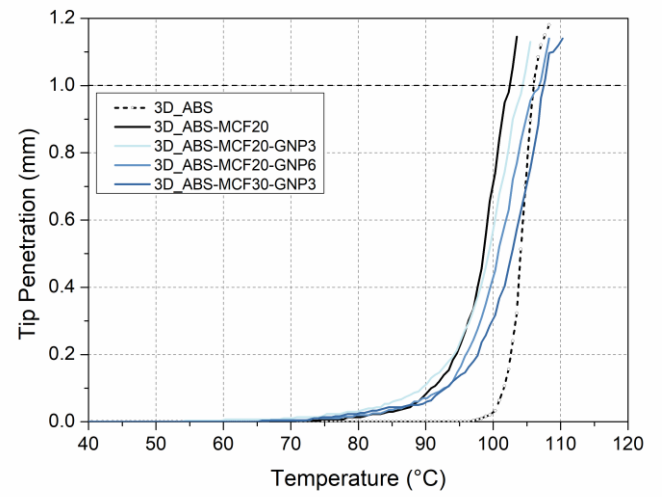

(b)

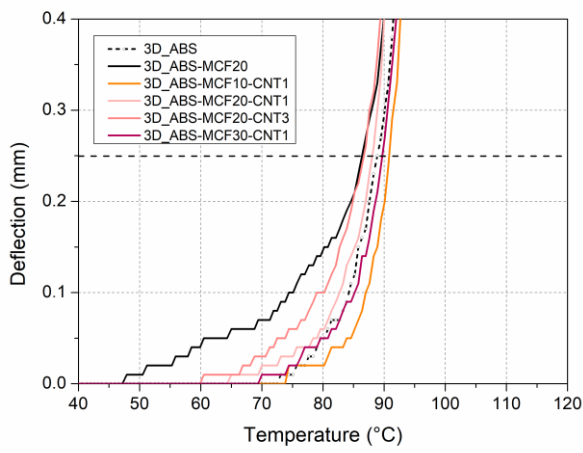

(c)

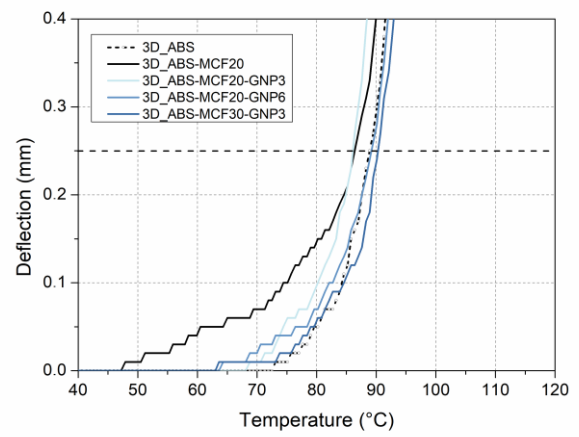

(d)

**Figure S4.** Effect of nano reinforcement on VST (a, b) and HDT (c, d) thermograms of multiscale composite 3D-printed samples with CNT (left) and GNP (right).

**Table S1.** The volume fraction of ABS multiscale composites at various content of MCF, CNT, and GNP. The Aspect Ratio of the single components and their combination in composites, Composite Aspect Ratio, is also reported (calculated according to Equation (7)).

| Sample         | Material composition |       |       |       | Aspect Ratio and CAR |      |         |
|----------------|----------------------|-------|-------|-------|----------------------|------|---------|
|                | ABS                  | MCF   | CNT   | GNP   | min                  | max  | average |
| ABS            | 1.000                | 0.000 | 0.000 | 0.000 | //                   | //   |         |
| MCF            | 0.000                | 1.000 | 0.000 | 0.000 | 14                   | 21   | 17.5    |
| CNT            | 0.000                | 0.000 | 1.000 | 0.000 | 158                  | 158  | 158     |
| GNP            | 0.000                | 0.000 | 0.000 | 1.000 | 625                  | 833  | 729     |
| ABS-MCF10      | 0.938                | 0.062 | 0.000 | 0.000 | 0.9                  | 1.3  | 1.1     |
| ABS-MCF20      | 0.871                | 0.129 | 0.000 | 0.000 | 1.8                  | 2.7  | 2.3     |
| ABS-MCF30      | 0.797                | 0.203 | 0.000 | 0.000 | 2.8                  | 4.3  | 3.6     |
| ABS-MCF10-CNT1 | 0.933                | 0.062 | 0.005 | 0.000 | 1.7                  | 3.7  | 2.7     |
| ABS-MCF10-CNT2 | 0.927                | 0.063 | 0.010 | 0.000 | 2.5                  | 5.3  | 3.9     |
| ABS-MCF10-CNT3 | 0.922                | 0.063 | 0.015 | 0.000 | 3.3                  | 6.8  | 5.1     |
| ABS-MCF20-CNT1 | 0.865                | 0.130 | 0.005 | 0.000 | 4.4                  | 5.8  | 5.1     |
| ABS-MCF20-CNT2 | 0.859                | 0.131 | 0.011 | 0.000 | 6.0                  | 7.4  | 6.7     |
| ABS-MCF20-CNT3 | 0.852                | 0.132 | 0.016 | 0.000 | 7.5                  | 8.9  | 8.2     |
| ABS-MCF30-CNT1 | 0.790                | 0.204 | 0.006 | 0.000 | 5.8                  | 7.9  | 6.8     |
| ABS-MCF30-CNT2 | 0.783                | 0.205 | 0.011 | 0.000 | 7.4                  | 9.5  | 8.4     |
| ABS-MCF30-CNT3 | 0.777                | 0.207 | 0.017 | 0.000 | 8.9                  | 11.0 | 10.0    |
| ABS-MCF10-GNP3 | 0.921                | 0.063 | 0.000 | 0.016 | 20.2                 | 27.1 | 23.6    |
| ABS-MCF10-GNP6 | 0.903                | 0.064 | 0.000 | 0.033 | 38.9                 | 52.1 | 45.5    |
| ABS-MCF10-GNP9 | 0.885                | 0.065 | 0.000 | 0.050 | 57.7                 | 77.1 | 67.4    |
| ABS-MCF20-GNP3 | 0.852                | 0.131 | 0.000 | 0.017 | 21.6                 | 29.2 | 25.4    |
| ABS-MCF20-GNP6 | 0.832                | 0.134 | 0.000 | 0.034 | 40.3                 | 54.2 | 47.2    |
| ABS-MCF20-GNP9 | 0.812                | 0.136 | 0.000 | 0.052 | 59.1                 | 79.2 | 69.1    |
| ABS-MCF30-GNP3 | 0.776                | 0.206 | 0.000 | 0.018 | 23.0                 | 31.3 | 27.1    |
| ABS-MCF30-GNP6 | 0.754                | 0.210 | 0.000 | 0.036 | 41.7                 | 56.3 | 49.0    |
| ABS-MCF30-GNP9 | 0.732                | 0.214 | 0.000 | 0.054 | 60.5                 | 81,3 | 70.9    |

**Table S2.** Average melt flow index (MFI) at 10 kg and 220 °C of ABS multiscale composites (from CM samples).

| Type of composite | Avg. MFI<br>(g/10 min) |
|-------------------|------------------------|
| CM_ABS            | 33.1 ± 1.2             |
| CM_ABS-MCF10      | 25.6 ± 1.9             |
| CM_ABS-MCF20      | 20.8 ± 0.8             |
| CM_ABS-MCF30      | 17.4 ± 1.4             |
| CM_ABS-MCF10-CNT1 | 15.3 ± 1.0             |
| CM_ABS-MCF10-CNT2 | 8.1 ± 0.9              |
| CM_ABS-MCF10-CNT3 | 2.7 ± 0.2              |
| CM_ABS-MCF20-CNT1 | 10.9 ± 0.6             |
| CM_ABS-MCF20-CNT2 | 4.5 ± 0.3              |
| CM_ABS-MCF20-CNT3 | 1.2 ± 0.1              |
| CM_ABS-MCF30-CNT1 | 6.5 ± 0.5              |
| CM_ABS-MCF30-CNT2 | 3.2 ± 0.2              |
| CM_ABS-MCF30-CNT3 | 0.5 ± 0.0              |
| CM_ABS-MCF10-GNP3 | 20.3 ± 1.4             |
| CM_ABS-MCF10-GNP6 | 15.1 ± 0.9             |
| CM_ABS-MCF10-GNP9 | 11.7 ± 0.4             |
| CM_ABS-MCF20-GNP3 | 15.3 ± 0.8             |
| CM_ABS-MCF20-GNP6 | 9.3 ± 0.5              |
| CM_ABS-MCF20-GNP9 | 7.4 ± 0.4              |
| CM_ABS-MCF30-GNP3 | 9.8 ± 0.5              |
| CM_ABS-MCF30-GNP6 | 6.3 ± 0.5              |
| CM_ABS-MCF30-GNP9 | 5.3 ± 0.3              |

Another parameter  $P2 = P_{E, MFI, H}$  that maximizes both the stiffness, the processability, and the hardness can be calculated from Equation (S1):

$$P_{E, MFI, H} = P_{E, MFI} \times H = E_T \times MFI \times H \quad (S1)$$

where  $E_T$ , MFI, and H represent the tensile modulus, the melt flow index, and the hardness (micro).

Specific data are reported in **Table 5**, **Table S2**, and **Table S3**.



**Table S3.** Results of nanoindentation tests of ABS multiscale CM samples. The results of Elastic modulus (En) and Hardness (H) are reported as an average of 300 measurements. Selection parameter  $P2 = P_{E, MFI, H}$  is also reported according to Equation S1. In column P2, the bold values evidence the selected compositions for FFF.

| Type of composite | Avg. $E_n$<br>(GPa) | Avg. $H$<br>(GPa) | $P2 = P_{E, MFI, H} \times 10^{-3}$<br>(GPa <sup>2</sup> g/10min) |
|-------------------|---------------------|-------------------|-------------------------------------------------------------------|
| CM_ABS            | $2.84 \pm 0.12$     | $0.16 \pm 0.02$   | <b>12.3</b>                                                       |
| CM_ABS-MCF10      | $3.25 \pm 0.48$     | $0.19 \pm 0.08$   | 18.3                                                              |
| CM_ABS-MCF20      | $3.71 \pm 0.55$     | $0.18 \pm 0.08$   | <b>22.5</b>                                                       |
| CM_ABS-MCF30      | $4.44 \pm 0.78$     | $0.22 \pm 0.10$   | 25.2                                                              |
| CM_ABS-MCF10-CNT1 | $3.58 \pm 0.61$     | $0.21 \pm 0.10$   | <b>11.6</b>                                                       |
| CM_ABS-MCF10-CNT2 | $3.29 \pm 0.44$     | $0.17 \pm 0.06$   | 5.31                                                              |
| CM_ABS-MCF10-CNT3 | $3.57 \pm 0.60$     | $0.21 \pm 0.11$   | 2.22                                                              |
| CM_ABS-MCF20-CNT1 | $4.00 \pm 0.84$     | $0.24 \pm 0.17$   | <b>13.5</b>                                                       |
| CM_ABS-MCF20-CNT2 | $3.98 \pm 0.74$     | $0.24 \pm 0.15$   | 5.73                                                              |
| CM_ABS-MCF20-CNT3 | $4.15 \pm 0.78$     | $0.25 \pm 0.18$   | <b>1.60</b>                                                       |
| CM_ABS-MCF30-CNT1 | $4.78 \pm 0.97$     | $0.31 \pm 0.21$   | <b>12.9</b>                                                       |
| CM_ABS-MCF30-CNT2 | $4.55 \pm 0.95$     | $0.31 \pm 0.21$   | 6.32                                                              |
| CM_ABS-MCF30-CNT3 | $4.76 \pm 1.03$     | $0.28 \pm 0.18$   | 8.03                                                              |
| CM_ABS-MCF10-GNP3 | $3.86 \pm 0.55$     | $0.18 \pm 0.04$   | 13.4                                                              |
| CM_ABS-MCF10-GNP6 | $4.03 \pm 0.48$     | $0.19 \pm 0.04$   | 11.6                                                              |
| CM_ABS-MCF10-GNP9 | $3.93 \pm 0.59$     | $0.16 \pm 0.07$   | 8.91                                                              |
| CM_ABS-MCF20-GNP3 | $4.26 \pm 0.62$     | $0.22 \pm 0.12$   | <b>20.5</b>                                                       |
| CM_ABS-MCF20-GNP6 | $4.34 \pm 0.75$     | $0.19 \pm 0.09$   | <b>10.8</b>                                                       |
| CM_ABS-MCF20-GNP9 | $4.47 \pm 0.78$     | $0.20 \pm 0.12$   | 9.48                                                              |
| CM_ABS-MCF30-GNP3 | $4.66 \pm 0.83$     | $0.26 \pm 0.15$   | <b>18.4</b>                                                       |
| CM_ABS-MCF30-GNP6 | $5.23 \pm 1.01$     | $0.25 \pm 0.13$   | 13.0                                                              |
| CM_ABS-MCF30-GNP9 | $5.53 \pm 0.91$     | $0.23 \pm 0.13$   | 11.2                                                              |

In order to consider stiffness, processability and conductivity, the selective parameter,  $P3 = P_{E, MFI, Res}$ , has been recently proposed for the comparison of the filler effects [38], and it is defined by Equation (S2):

$$P_{E, MFI, Res} = P_{E, MFI} / Res = E_T \times MFI / Res \quad (S2)$$

where Res is the resistivity. The higher the  $P_{E, MFI, Res}$ , the better the properties, the higher the desirability of the composition for processability and properties. According to this parameter as expected all the composites with CNT exhibited the higher desirability parameters (see Table S4).

**Table S4.** Electrical resistivity (Res) of ABS multiscale CM samples as a function of the applied voltage. Selection parameter  $P3=P_{E,MFI,Res}$  is also reported according to Equation (S2).

| Type of composite | Voltage<br>(V) | Res<br>( $\Omega \cdot \text{cm}$ ) | Avg. Res<br>( $\Omega \cdot \text{cm}$ ) | $P3= E_T \times MFI/Res$<br>( $\text{GPa}^2 \text{ g}/10\text{min } \Omega^{-1} \cdot \text{cm}^{-1}$ ) |
|-------------------|----------------|-------------------------------------|------------------------------------------|---------------------------------------------------------------------------------------------------------|
| CM_ABS            | 100            | $(1.7 \pm 0.4) \times 10^{15}$      | $(1.7 \pm 0.4) \times 10^{15}$           | $4.50 \times 10^{-11}$                                                                                  |
| CM_ABS-MCF10      | 100            | $(1.4 \pm 0.5) \times 10^{15}$      | $(1.4 \pm 0.5) \times 10^{15}$           | $6.86 \times 10^{-11}$                                                                                  |
| CM_ABS-MCF20      | 100            | $(3.9 \pm 0.3) \times 10^{14}$      | $(3.9 \pm 0.3) \times 10^{14}$           | $3.2 \times 10^{-10}$                                                                                   |
| CM_ABS-MCF30      | 5              | $(8.1 \pm 1.4) \times 10^8$         | $(8.1 \pm 1.4) \times 10^8$              | $1.41 \times 10^{-4}$                                                                                   |
| CM_ABS-MCF10-CNT1 | 2              | $17.5 \pm 5.3$                      | $17.7 \pm 5.4$                           | $3.12 \times 10^3$                                                                                      |
|                   | 5              | $17.7 \pm 5.5$                      |                                          |                                                                                                         |
|                   | 12             | $17.8 \pm 5.5$                      |                                          |                                                                                                         |
|                   | 24             | $17.8 \pm 5.5$                      |                                          |                                                                                                         |
|                   | 30             | $17.5 \pm 5.2$                      |                                          |                                                                                                         |
| CM_ABS-MCF10-CNT2 | 2              | $7.2 \pm 1.5$                       | $7.3 \pm 1.5$                            | $4.28 \times 10^3$                                                                                      |
|                   | 5              | $7.2 \pm 1.6$                       |                                          |                                                                                                         |
|                   | 12             | $7.5 \pm 1.3$                       |                                          |                                                                                                         |
| CM_ABS-MCF10-CNT3 | 2              | $2.1 \pm 0.6$                       | $2.0 \pm 0.6$                            | $5.28 \times 10^3$                                                                                      |
|                   | 5              | $2.0 \pm 0.6$                       |                                          |                                                                                                         |
|                   | 12             | $2.0 \pm 0.7$                       |                                          |                                                                                                         |
| CM_ABS-MCF20-CNT1 | 2              | $6.5 \pm 0.4$                       | $6.5 \pm 0.3$                            | $8.66 \times 10^3$                                                                                      |
|                   | 5              | $6.5 \pm 0.2$                       |                                          |                                                                                                         |
|                   | 12             | $6.5 \pm 0.2$                       |                                          |                                                                                                         |
| CM_ABS-MCF20-CNT2 | 2              | $2.0 \pm 0.4$                       | $1.9 \pm 0.4$                            | $12.6 \times 10^3$                                                                                      |
|                   | 5              | $1.9 \pm 0.3$                       |                                          |                                                                                                         |
|                   | 12             | $1.9 \pm 0.3$                       |                                          |                                                                                                         |
| CM_ABS-MCF20-CNT3 | 2              | $1.5 \pm 0.2$                       | $1.5 \pm 0.2$                            | $4.27 \times 10^3$                                                                                      |
|                   | 5              | $1.5 \pm 0.2$                       |                                          |                                                                                                         |
|                   | 12             | $1.5 \pm 0.2$                       |                                          |                                                                                                         |
| CM_ABS-MCF30-CNT1 | 2              | $5.4 \pm 0.9$                       | $5.4 \pm 0.9$                            | $7.69 \times 10^3$                                                                                      |
|                   | 5              | $5.3 \pm 0.8$                       |                                          |                                                                                                         |
|                   | 12             | $5.4 \pm 0.9$                       |                                          |                                                                                                         |
| CM_ABS-MCF30-CNT2 | 2              | $1.2 \pm 0.2$                       | $1.2 \pm 0.2$                            | $17.0 \times 10^3$                                                                                      |
|                   | 5              | $1.2 \pm 0.2$                       |                                          |                                                                                                         |
|                   | 12             | $1.2 \pm 0.2$                       |                                          |                                                                                                         |
| CM_ABS-MCF30-CNT3 | 2              | $0.7 \pm 0.2$                       | $0.7 \pm 0.2$                            | $4.10 \times 10^3$                                                                                      |
|                   | 5              | $0.7 \pm 0.2$                       |                                          |                                                                                                         |
|                   | 12             | $0.7 \pm 0.2$                       |                                          |                                                                                                         |
| CM_ABS-MCF10-GNP3 | 100            | $(7.7 \pm 3.3) \times 10^9$         | $(7.7 \pm 3.3) \times 10^9$              | $9.64 \times 10^{-6}$                                                                                   |
| CM_ABS-MCF10-GNP6 | 100            | $(3.1 \pm 0.7) \times 10^8$         | $(3.1 \pm 0.7) \times 10^8$              | $1.96 \times 10^{-5}$                                                                                   |
| CM_ABS-MCF10-GNP9 | 100            | $(1.3 \pm 0.4) \times 10^7$         | $(1.3 \pm 0.4) \times 10^7$              | $4.28 \times 10^{-5}$                                                                                   |
| CM_ABS-MCF20-GNP3 | 100            | $(9.8 \pm 0.4) \times 10^8$         | $(9.8 \pm 0.4) \times 10^8$              | $9.5 \times 10^{-6}$                                                                                    |
| CM_ABS-MCF20-GNP6 | 100            | $(8.7 \pm 7.1) \times 10^7$         | $(8.7 \pm 7.1) \times 10^7$              | $6.53 \times 10^{-6}$                                                                                   |
| CM_ABS-MCF20-GNP9 | 100            | $(6.6 \pm 3.5) \times 10^7$         | $(6.6 \pm 3.5) \times 10^7$              | $7.18 \times 10^{-6}$                                                                                   |



|                   |    |           |           |     |
|-------------------|----|-----------|-----------|-----|
| CM_ABS-MCF30-GNP3 | 2  | 346 ± 260 | 397 ± 277 | 175 |
|                   | 5  | 324 ± 178 |           |     |
|                   | 12 | 403 ± 269 |           |     |
|                   | 24 | 483 ± 382 |           |     |
|                   | 30 | 427 ± 294 |           |     |
| CM_ABS-MCF30-GNP6 | 2  | 43 ± 20   | 60 ± 32   | 811 |
|                   | 5  | 68 ± 37   |           |     |
|                   | 12 | 64 ± 34   |           |     |
|                   | 24 | 64 ± 36   |           |     |
|                   | 30 | 62 ± 34   |           |     |
| CM_ABS-MCF30-GNP9 | 2  | 342 ± 140 | 382 ± 150 | 121 |
|                   | 5  | 399 ± 148 |           |     |
|                   | 12 | 403 ± 160 |           |     |
|                   | 24 | 394 ± 155 |           |     |
|                   | 30 | 373 ± 149 |           |     |

**Table S5.** Electrical resistivity (Res) of ABS multiscale 3D-printed samples as a function of the applied voltage. Comparative resistivity ratio between 3D-printed and compression-molded samples.

| Type of composite | Voltage<br>(V) | Res<br>(Ω.cm) | Avg. Res<br>(Ω.cm) | Resistivity ratio<br>3D vs. CM |
|-------------------|----------------|---------------|--------------------|--------------------------------|
| 3D_ABS-MCF20-CNT1 | 2              | 13.5 ± 2.1    | 13.7 ± 2.7         | 2.10                           |
|                   | 5              | 14.0 ± 3.1    |                    |                                |
|                   | 12             | 13.9 ± 2.6    |                    |                                |
|                   | 24             | 13.6 ± 2.7    |                    |                                |
|                   | 30             | 13.4 ± 2.8    |                    |                                |
| 3D_ABS-MCF20-CNT3 | 2              | 3.9 ± 1.0     | 3.9 ± 1.0          | 2.57                           |
|                   | 5              | 3.9 ± 1.0     |                    |                                |
|                   | 12             | 3.8 ± 1.0     |                    |                                |
|                   | 24             | 3.9 ± 1.0     |                    |                                |
|                   | 30             | 3.8 ± 1.1     |                    |                                |
| 3D_ABS-MCF30-CNT1 | 2              | 1.6 ± 0.3     | 1.6 ± 0.2          | 0.30                           |
|                   | 5              | 1.7 ± 0.3     |                    |                                |
|                   | 12             | 1.6 ± 0.1     |                    |                                |
|                   | 24             | 1.6 ± 0.1     |                    |                                |
|                   | 30             | 1.6 ± 0.2     |                    |                                |
